# Supplementary material for: Laboratory and field validation of a combined NO2–SO2 Radiello passive sampler
Source: Royal Society of Chemistry journal article supplement (doi:10.1039/b708925b), 2007-01-01
Supplement: b708925b.pdf [file b708925b.pdf]

**DATA TABLES COMPARATIVE FIELD TESTS SAMPLERS-CONTINUOUS ANALYZERS**

**Table 1: Summary results measuring period 20**

(Gradko, Radiello: results blank corrected; IVL: results not blank corrected)

|            | <b>Radiello<br/>Analysis VITO<br/>(desorption by<br/>Vortex)</b> | <b>Radiello<br/>Analysis VITO<br/>(Ultrasonic<br/>desorption)</b> | <b>Gradko<br/>Analysis VITO</b> | <b>Gradko<br/>Analysis Gradko</b> | <b>IVL</b>                                                                                                | <b>VMM-Analyzer</b> |
|------------|------------------------------------------------------------------|-------------------------------------------------------------------|---------------------------------|-----------------------------------|-----------------------------------------------------------------------------------------------------------|---------------------|
|            | <b><math>\mu\text{g}/\text{m}^3 \text{NO}_2</math> at 20°C</b>   |                                                                   |                                 |                                   |                                                                                                           |                     |
| Borgerhout | <b>52,8 ± 8,8</b><br>17% rsd                                     | <b>48,2 ± 10,7</b><br>22% rsd                                     | <b>44 ± 4</b><br>9,1% rsd       | <b>39,5 ± 1,8</b><br>4,5% rsd     | <b>52,9 ± 2,1</b><br>4,0% rsd                                                                             | <b>55</b>           |
| Ghent      | <b>33,2 ± 7,3</b><br>22% rsd                                     | <b>33,2 ± 0,9</b><br>2,8% rsd                                     | <b>31 ± 0</b><br>0% rsd         | <b>27,5 ± 2,6</b><br>9,3% rsd     | <b>36,6 ± 0,7</b><br>1,9% rsd                                                                             | <b>37</b>           |
|            | <b><math>\mu\text{g}/\text{m}^3 \text{SO}_2</math> at 20°C</b>   |                                                                   |                                 |                                   |                                                                                                           |                     |
| Borgerhout | <b>4,0 ± 0,2</b><br>6,0% rsd                                     | <b>3,7 ± 0,4</b><br>9,8% rsd                                      | <b>10 ± 2</b><br>21% rsd        | <b>6,8 ± 0,8</b><br>11,2% rsd     | <b>5,2 ± 0,2</b><br>3,0% rsd                                                                              | <b>5,2</b>          |
| Ghent      | <b>4,1 ± 0,7</b><br>17% rsd                                      | <b>2,8 ± 0,2</b><br>5,9% rsd                                      | <b>13 ± 0</b><br>0% rsd         | <b>5,5 ± 0,6</b><br>11,5% rsd     | <b>9,9 ± 7,1</b><br>(3 samplers, 72% rsd)<br><b>5,8 ± 0,4</b><br>(1 sampler result left<br>out, rsd 6,1%) | <b>5,6</b>          |

■ rsd (relative standard deviation) >30%

**Table 2: Ratio samplers/VMM-analyzers (measuring period 20)**

| Measuring location | Radiello Analysis VITO (desorption by Vortex) | Radiello Analysis VITO (Ultrasonic desorption) | Gradko Analysis VITO | Gradko Analysis Gradko | IVL                                                                | OGAWA |
|--------------------|-----------------------------------------------|------------------------------------------------|----------------------|------------------------|--------------------------------------------------------------------|-------|
|                    | NO <sub>2</sub>                               |                                                |                      |                        |                                                                    |       |
| Borgerhout         | 0,96                                          | 0,88                                           | 0,80                 | 0,72                   | 0,96                                                               | -     |
| Ghent              | 0,90                                          | 0,90                                           | 0,84                 | 0,74                   | 0,99                                                               | -     |
|                    | SO <sub>2</sub>                               |                                                |                      |                        |                                                                    |       |
| Borgerhout         | 0,77                                          | 0,71                                           | 1,92                 | 1,31                   | 1,00                                                               | -     |
| Ghent              | 0,73                                          | 0,50                                           | 2,32                 | 0,98                   | 1,77 (3 samplers)<br>background-color: #90EE90;">1,04 (2 samplers) | -     |

ratio between 0,7 and 1,3  
 ratio <0,7 or >1,3

**Table 3: Summary results measuring period 21**

(Gradko, Radiello: results blank corrected; IVL: results not blank corrected)

|            | <b>Radiello<br/>Analysis VITO<br/>(desorption by<br/>Vortex)</b>                    | <b>Radiello<br/>Analysis<br/>VITO<br/>(Ultrasonic<br/>desorption)</b> | <b>Gradko<br/>Analysis<br/>VITO</b> | <b>Gradko<br/>Analysis<br/>Gradko</b>                                               | <b>IVL</b>                    | <b>OGAWA</b>                                                                 | <b>VMM-<br/>Analyzer</b> |
|------------|-------------------------------------------------------------------------------------|-----------------------------------------------------------------------|-------------------------------------|-------------------------------------------------------------------------------------|-------------------------------|------------------------------------------------------------------------------|--------------------------|
|            | <b>µg/m<sup>3</sup> NO<sub>2</sub> at 20°C</b>                                      |                                                                       |                                     |                                                                                     |                               |                                                                              |                          |
| Borgerhout | <b>47,4 ± 5,1</b><br>11% rsd                                                        | <b>58,8 ± 1,3</b><br>2,3% rsd                                         | <b>38 ± 0,8</b><br>2,1% rsd         | <b>38,4 ± 7,8</b><br>20% rsd                                                        | <b>42,3 ± 0,1</b><br>0,3% rsd | <b>47,3 ± 5,2</b><br>11% rsd                                                 | 44,7                     |
| Ghent      | <b>16,0 ± 2,1</b><br>13% rsd                                                        | <b>22,2 ± 2,7</b><br>12% rsd                                          | <b>17,5 ± 0,9</b><br>5,2% rsd       | <b>20,7 ± 1,5</b><br>7,0 % rsd                                                      | <b>22,2 ± 0,3</b><br>1,3% rsd | <b>22,4 ± 2,1</b><br>9,2% rsd                                                | 21,0                     |
|            | <b>µg/m<sup>3</sup> SO<sub>2</sub> at 20°C</b>                                      |                                                                       |                                     |                                                                                     |                               |                                                                              |                          |
| Borgerhout | <b>3,6 ± 0,5</b><br>14% rsd                                                         | <b>4,2 ± 0,3</b><br>6,1% rsd                                          | <field blank                        | <b>5,7*</b> ± 2,8<br>48% rsd<br><b>4,1 ± 0,4</b><br>(1 result rejected:<br>11% rsd) | <b>4,3 ± 0,1</b><br>2,7% rsd  | <b>5,2 ± 5,5</b><br>106% rsd                                                 | 3,9                      |
| Ghent      | <b>3,6 ± 2,3</b><br>66% rsd<br><b>2,2 ± 0,2</b><br>(1 result rejected:<br>7,1% rsd) | <b>3,2 ± 1,2</b><br>38% rsd                                           | <field blank                        | <b>8,1*</b> ± 0,7<br>8,1% rsd                                                       | <b>2,8 ± 0,2</b><br>5,4% rsd  | 6,6 ± 2,7<br>42% rsd<br><b>8,1 ± 0,7</b><br>(1 result rejected:<br>9,2% rsd) | 2,2                      |

\* Corrected by Gradko for lab blank instead of field blanks. Field blanks were in the same range as the exposed samplers

■ rsd (relative standard deviation) >30%

**Table 4: Ratio samplers/VMM-analyzers (measuring period 21)**

| Measuring location | Radiello Analysis VITO (desorption by Vortex) | Radiello Analysis VITO (Ultrasonic desorption) | Gradko Analysis VITO | Gradko Analysis Gradko | IVL  | OGAWA                                  |
|--------------------|-----------------------------------------------|------------------------------------------------|----------------------|------------------------|------|----------------------------------------|
|                    | <b>NO<sub>2</sub></b>                         |                                                |                      |                        |      |                                        |
| Borgerhout         | 1,06                                          | 1,32                                           | 0,85                 | 0,86                   | 0,95 | 1,06                                   |
| Ghent              | 0,76                                          | 1,06                                           | 0,83                 | 0,99                   | 1,06 | 1,07                                   |
|                    | <b>SO<sub>2</sub></b>                         |                                                |                      |                        |      |                                        |
| Borgerhout         | 0,92                                          | 1,08                                           | -                    | 1,46<br>1,05           | 1,10 | 1,33                                   |
| Ghent              | 1,64 (3 samplers)<br>1,00 (2 samplers)        | 1,45                                           | -                    | 3,68                   | 1,27 | 3,00 (3 samplers)<br>3,68 (2 samplers) |

ratio between 0,7 and 1,3  
 ratio <0,7 or >1,3

**Table 5: Summary results measuring period 22**

**(Gradko, Radiello: results blank corrected; IVL: results not blank corrected)**

|            | <b>Radiello<br/>Analysis VITO<br/>(desorption by<br/>Vortex)</b> | <b>Radiello<br/>Analysis<br/>VITO<br/>(Ultrasonic<br/>desorption)</b> | <b>Gradko<br/>Analysis<br/>VITO</b>                                                          | <b>Gradko<br/>Analysis<br/>Gradko</b>                                                        | <b>IVL</b>                    | <b>OGAWA</b>                                                                               | <b>VMM-<br/>Analyzer</b> |
|------------|------------------------------------------------------------------|-----------------------------------------------------------------------|----------------------------------------------------------------------------------------------|----------------------------------------------------------------------------------------------|-------------------------------|--------------------------------------------------------------------------------------------|--------------------------|
|            | <b>µg/m<sup>3</sup> NO<sub>2</sub> at 20°C</b>                   |                                                                       |                                                                                              |                                                                                              |                               |                                                                                            |                          |
| Borgerhout | <b>35,1 ± 3,0</b><br>8,4% rsd                                    | <b>43,5 ± 15,8</b><br><b>36%</b> rsd                                  | <b>38,7 ± 2,1</b><br>5,3% rsd                                                                | <b>38,3 ± 8,1</b><br>21% rsd                                                                 | <b>45,7 ± 1,8</b><br>4,0% rsd | <b>42 ± 15</b><br><b>36%</b> rsd)<br><b>50,6 ± 0,2</b><br>(1 result rejected:<br>0,4% rsd) | <b>51,4</b>              |
| Ghent      | <b>18,2 ± 3,5</b><br>19 % rsd                                    | <b>17,4 ± 4,4</b><br>25% rsd                                          | <b>18,3 ± 0,8</b><br>4,3% rsd                                                                | <b>17,3 ± 1,4</b><br>8,2 % rsd                                                               | <b>23,3 ± 0,5</b><br>2,1% rsd | <b>25,6 ± 2,7</b><br>10% rsd                                                               | <b>27,3</b>              |
|            | <b>µg/m<sup>3</sup> SO<sub>2</sub> at 20°C</b>                   |                                                                       |                                                                                              |                                                                                              |                               |                                                                                            |                          |
| Borgerhout | <b>5,7 ± 0,7</b><br>13% rsd                                      | <b>5,5 ± 1,2</b><br>22% rsd                                           | <b>16,2 ± 6,5</b><br><b>40%</b> rsd<br><b>19,9 ± 0,4</b><br>(1 result rejected:<br>2,1% rsd) | <b>7,7 ± 2,6</b><br><b>(34%)</b> rsd)<br><b>6,3 ± 0,8</b><br>(1 result rejected:<br>13% rsd) | <b>7,8 ± 0,1</b><br>1,3% rsd  | <b>6,4 ± 2,4</b><br><b>38%</b> rsd)<br><b>7,6 ± 1,3</b><br>(1 result rejected:<br>17% rsd) | <b>6,9</b>               |
| Ghent      | <b>1,9 ± 0,3</b><br>17% rsd                                      | <b>1,7 ± 0,2</b><br>9% rsd                                            | <b>13,3 ± 20,6</b><br><b>155 %</b> rsd                                                       | <b>4,8 ± 1,9</b><br><b>(39%)</b> rsd)<br><b>5,8 ± 0,6</b><br>(1 result rejected:<br>13% rsd) | <b>3,0 ± 0,1</b><br>3,9% rsd  | <b>49,1 ± 79</b><br>(162% rsd)<br><b>3,3 ± 0,4</b><br>(1 result rejected:<br>11% rsd)      | <b>2,6</b>               |

**Table 6: Ratio samplers/VMM-analyzers (measuring period 22)**

| Measuring location    | Radiello Analysis VITO (desorption by Vortex) | Radiello Analysis VITO (Ultrasonic desorption) | Gradko Analysis VITO | Gradko Analysis Gradko                 | IVL  | OGAWA                                  |
|-----------------------|-----------------------------------------------|------------------------------------------------|----------------------|----------------------------------------|------|----------------------------------------|
| <b>NO<sub>2</sub></b> |                                               |                                                |                      |                                        |      |                                        |
| Borgerhout            | 0,68                                          | 0,85                                           | 0,75                 | 0,75                                   | 0,89 | 0,82<br>0,98                           |
| Ghent                 | 0,67                                          | 0,64                                           | 0,67                 | 0,63                                   | 0,85 | 0,94                                   |
| <b>SO<sub>2</sub></b> |                                               |                                                |                      |                                        |      |                                        |
| Borgerhout            | 0,83                                          | 0,80                                           | 2,4                  | 1,12 (3 samplers)<br>0,91 (2 samplers) | 1,13 | 0,93 (3 samplers)<br>1,10 (2 samplers) |
| Ghent                 | 0,73                                          | 0,65                                           | 5,1                  | 1,85 (3 samplers)<br>2,23 (2 samplers) | 1,15 | 18,9 (3 samplers)<br>1,27 (2 samplers) |

 ratio between 0,7 and 1,3  
 ratio <0,7 or >1,3

**Table 7: Summary results measuring period 23**

(Gradko, Radiello: results blank corrected; IVL: results not blank corrected)

|            | <b>Radiello<br/>Analysis VITO<br/>(desorption by<br/>Vortex)</b> | <b>Radiello<br/>Analysis<br/>VITO<br/>(Ultrasonic<br/>desorption)</b> | <b>Gradko<br/>Analysis<br/>VITO</b> | <b>Gradko<br/>Analysis<br/>Gradko</b> | <b>IVL</b> | <b>OGAWA</b>           | <b>VMM-<br/>Analyzer</b> |
|------------|------------------------------------------------------------------|-----------------------------------------------------------------------|-------------------------------------|---------------------------------------|------------|------------------------|--------------------------|
|            | <b>µg/m<sup>3</sup> NO<sub>2</sub> at 20°C</b>                   |                                                                       |                                     |                                       |            |                        |                          |
| Borgerhout | 37,1 ± 9,8<br>26,3% rsd                                          | -                                                                     | -                                   | -                                     | -          | 55,6 ± 4,6<br>8,3% rsd | 54,9                     |
| Ghent      | 25,6 ± 0,6<br>2,3% rsd                                           | -                                                                     | -                                   | -                                     | -          | 29,3 ± 3,0<br>10% rsd  | 31,3                     |
|            | <b>µg/m<sup>3</sup> SO<sub>2</sub> at 20°C</b>                   |                                                                       |                                     |                                       |            |                        |                          |
| Borgerhout | 11,4 ± 0,4<br>3,7% rsd                                           | -                                                                     | -                                   | -                                     | -          | 22,8 ± 7,4<br>32% rsd  | 15,2                     |
| Ghent      | 3,4 ± 0,2<br>5,4 % rsd                                           | -                                                                     | -                                   | -                                     | -          | 4,5 ± 1,4<br>32% rsd   | 4,79                     |

■ rsd (relative standard deviation) >30%



**Table 8: Ratio samplers/VMM-analyzers**

| Measuring location | Radiello Analysis VITO (desorption by Vortex) | Radiello Analysis VITO (Ultrasonic desorption) | Gradko Analysis VITO | Gradko Analysis Gradko | IVL | OGAWA |
|--------------------|-----------------------------------------------|------------------------------------------------|----------------------|------------------------|-----|-------|
|                    | <b>NO<sub>2</sub></b>                         |                                                |                      |                        |     |       |
| Borgerhout         | 0,68                                          | -                                              | -                    | -                      | -   | 1,01  |
| Ghent              | 0,82                                          | -                                              | -                    | -                      | -   | 0,94  |
|                    | <b>SO<sub>2</sub></b>                         |                                                |                      |                        |     |       |
| Borgerhout         | 0,75                                          | -                                              | -                    | -                      | -   | 1,50  |
| Ghent              | 0,71                                          | -                                              | -                    | -                      | -   | 0,94  |

  ratio between 0,7 and 1,3  
  ratio <0,7 or >1,3

**PRIMARY DATA INDIVIDUAL SAMPLERS**

**Tabel 9: Results Borgerhout for the different sampler types**

| Sampler type                   | Identification numbers samplers                                   |     |     | MP20 |      |      | MP21 |      |      | MP22 |      |      | MP23 |      |      |
|--------------------------------|-------------------------------------------------------------------|-----|-----|------|------|------|------|------|------|------|------|------|------|------|------|
|                                | $\mu\text{g}/\text{m}^3 \text{NO}_2 \text{ at } 20^\circ\text{C}$ |     |     |      |      |      |      |      |      |      |      |      |      |      |      |
| Radiello Vortex desorption     | 41                                                                | 42  | 443 | 45,8 | 62,7 | 49,7 | 52,0 | 41,9 | 48,5 | 34,6 | 32,4 | 38,3 | 44,0 | 30,2 |      |
| IVL-NO <sub>2</sub>            | 241                                                               | 242 | 243 | 50,5 | 53,9 | 54,4 | 42,4 | 42,2 | 42,2 | 47,0 | 43,6 | 46,5 | -    | -    | -    |
| Ogawa                          | 341                                                               | 342 | 343 | -    | -    | -    | 48   | 47   | 47   | 24   | 51   | 50   | 59,6 | 50,6 | 56,5 |
| Radiello-Ultrasonic desorption | 441                                                               | 442 |     | 55,8 | 40,7 |      | 57,9 | 59,8 |      | 32,3 | 54,6 |      | -    | -    | -    |
| Gradko-UK                      | 541                                                               | 542 | 543 | 37,5 | 40,3 | 40,7 | 35,4 | 32,6 | 47,3 | 35,4 | 47,4 | 32,0 | -    | -    | -    |
| Gradko-VITO                    | 641                                                               | 642 | 643 | 40   | 48   | 44   | 38   | 37   | 39   | 41   | 38   | 37   | -    | -    | -    |

**Tabel 10: Results Borgerhout for the different sampler types**

| Sampler type                   | Identification numbers samplers                                   |     |     | MP20 |     |     | MP21               |                    |                    | MP22 |      |      | MP23 |      |      |
|--------------------------------|-------------------------------------------------------------------|-----|-----|------|-----|-----|--------------------|--------------------|--------------------|------|------|------|------|------|------|
|                                | $\mu\text{g}/\text{m}^3 \text{SO}_2 \text{ at } 20^\circ\text{C}$ |     |     |      |     |     |                    |                    |                    |      |      |      |      |      |      |
| Radiello Vortex desorption     | 41                                                                | 42  | 443 | 4,3  | 3,8 | 3,9 | 3,4                | 3,2                | 4,1                | 6,0  | 4,9  | 6,3  | 11,1 | 11,7 |      |
| IVL-SO <sub>2</sub>            | 141                                                               | 142 | 143 | 5,2  | 5,0 | 5,3 | 4,2                | 4,4                | 4,2                | 7,9  | 7,7  | 7,8  | -    | -    | -    |
| Ogawa                          | 341                                                               | 342 | 343 | -    | -   | -   | 1,2                | 11                 | 2,9                | 3,8  | 6,7  | 8,6  | 20,3 | 31,1 | 17,0 |
| Radiello-Ultrasonic desorption | 441                                                               | 442 |     | 4,0  | 3,5 |     | 4,0                | 4,3                |                    | 4,7  | 6,3  |      | -    | -    | -    |
| Gradko-UK                      | 541                                                               | 542 | 543 | 6,2  | 6,6 | 7,7 | 3,8*               | 4,4*               | 8,9*               | 6,8  | 10,7 | 5,7  | -    | -    | -    |
| Gradko-VITO                    | 641                                                               | 642 | 643 | 7,9  | 12  | 9,8 | <field blank (<16) | <field blank (<16) | <field blank (<16) | 8,7  | 19,6 | 20,2 | -    | -    | -    |

\* corrected for lab-blank instead of field blank

**Tabel 11: Results Ghent for the different sampler types**

| Sampler type                   | Identification numbers samplers                                   |            |            | MP20 |      |      | MP21 |      |      | MP22 |      |      | MP23 |      |      |
|--------------------------------|-------------------------------------------------------------------|------------|------------|------|------|------|------|------|------|------|------|------|------|------|------|
|                                | $\mu\text{g}/\text{m}^3 \text{NO}_2 \text{ at } 20^\circ\text{C}$ |            |            |      |      |      |      |      |      |      |      |      |      |      |      |
| Radiello Vortex desorption     | <b>31</b>                                                         | <b>32</b>  | <b>433</b> | 25,6 | 33,8 | 40,1 | 18,0 | 13,8 | 16,2 | 22,2 | 16,9 | 15,5 | 25,1 | 26,0 |      |
| IVL-NO <sub>2</sub>            | <b>231</b>                                                        | <b>232</b> | <b>233</b> | 35,8 | 37,1 | 36,8 | 22,0 | 22,5 | 22,0 | 23,5 | 22,7 | 23,6 | -    | -    | -    |
| Ogawa                          | <b>331</b>                                                        | <b>332</b> | <b>333</b> | -    | -    | -    | 24   | 23   | 20   | 25   | 23   | 29   | 30,7 | 25,8 | 31,4 |
| Radiello-Ultrasonic desorption | <b>431</b>                                                        | <b>432</b> |            | 32,5 | 33,8 |      | 20,3 | 24,2 |      | 20,5 | 14,3 |      | -    | -    | -    |
| Gradko-UK                      | <b>531</b>                                                        | <b>532</b> | <b>533</b> | 29,0 | 29,0 | 24,6 | 22,3 | 20,3 | 19,6 | 18,3 | 15,7 | 17,9 | -    | -    | -    |
| Gradko-VITO                    | <b>631</b>                                                        | <b>632</b> | <b>633</b> | 31   | 31   | -    | 18   | 17   | 18   | 19   | 17   | 19   | -    | -    | -    |

**Tabel 12: Results Ghent for the different sampler-types**

| Samlertype                     | Identification numbers samplers                                   |            |            | MP20 |     |     | MP21                |     |                     | MP22 |     |     | MP23 |     |     |
|--------------------------------|-------------------------------------------------------------------|------------|------------|------|-----|-----|---------------------|-----|---------------------|------|-----|-----|------|-----|-----|
|                                | $\mu\text{g}/\text{m}^3 \text{SO}_2 \text{ at } 20^\circ\text{C}$ |            |            |      |     |     |                     |     |                     |      |     |     |      |     |     |
| Radiello Vortex desorption     | <b>31</b>                                                         | <b>32</b>  | <b>433</b> | 4,7  | 4,2 | 3,3 | 2,1                 | 2,3 | 6,2                 | 2,1  | 1,6 | 2,1 | 3,6  | 3,3 |     |
| IVL-SO <sub>2</sub>            | <b>131</b>                                                        | <b>132</b> | <b>133</b> | 5,5  | 6,0 | 18  | 3,0                 | 2,8 | 2,7                 | 2,9  | 2,9 | 3,1 | -    | -   | -   |
| Ogawa                          | <b>331</b>                                                        | <b>332</b> | <b>333</b> | -    | -   | -   | 3,5                 | 8,6 | 7,6                 | 3,6  | 141 | 3,1 | 3,5  | 6,2 | 4,0 |
| Radiello-Ultrasonic desorption | <b>431</b>                                                        | <b>432</b> |            | 2,9  | 2,6 |     | 4,0                 | 2,3 |                     | 1,6  | 1,8 |     | -    | -   | -   |
| Gradko-UK                      | <b>531</b>                                                        | <b>532</b> | <b>533</b> | 5,1  | 6,2 | 5,1 | 8,8                 | 7,9 | 7,6                 | 6,2  | 2,7 | 5,4 | -    | -   | -   |
| Gradko-VITO                    | <b>631</b>                                                        | <b>632</b> | <b>633</b> | 13   | 13  | -   | < field blank (<16) | 30  | < field blank (<16) | 37   | 3,0 | 0   | -    | -   | -   |
